# Supplementary material for: Postoperative circulating tumor DNA as markers of recurrence risk in stages II to III colorectal cancer
Source: PubMed Central journal article supplement (PMC8130394; doi:10.1186/s13045-021-01089-z), 2021-05-17

Figure S1. Heatmap demonstrating the mutational landscape of the primary tumors from 240 evaluable patients, with the upper third depicting the mutation counts of each patient, the middle third presenting the top 20 recurrently-mutated genes in this cohort, and the lower third showing the corresponding clinicopathological features.

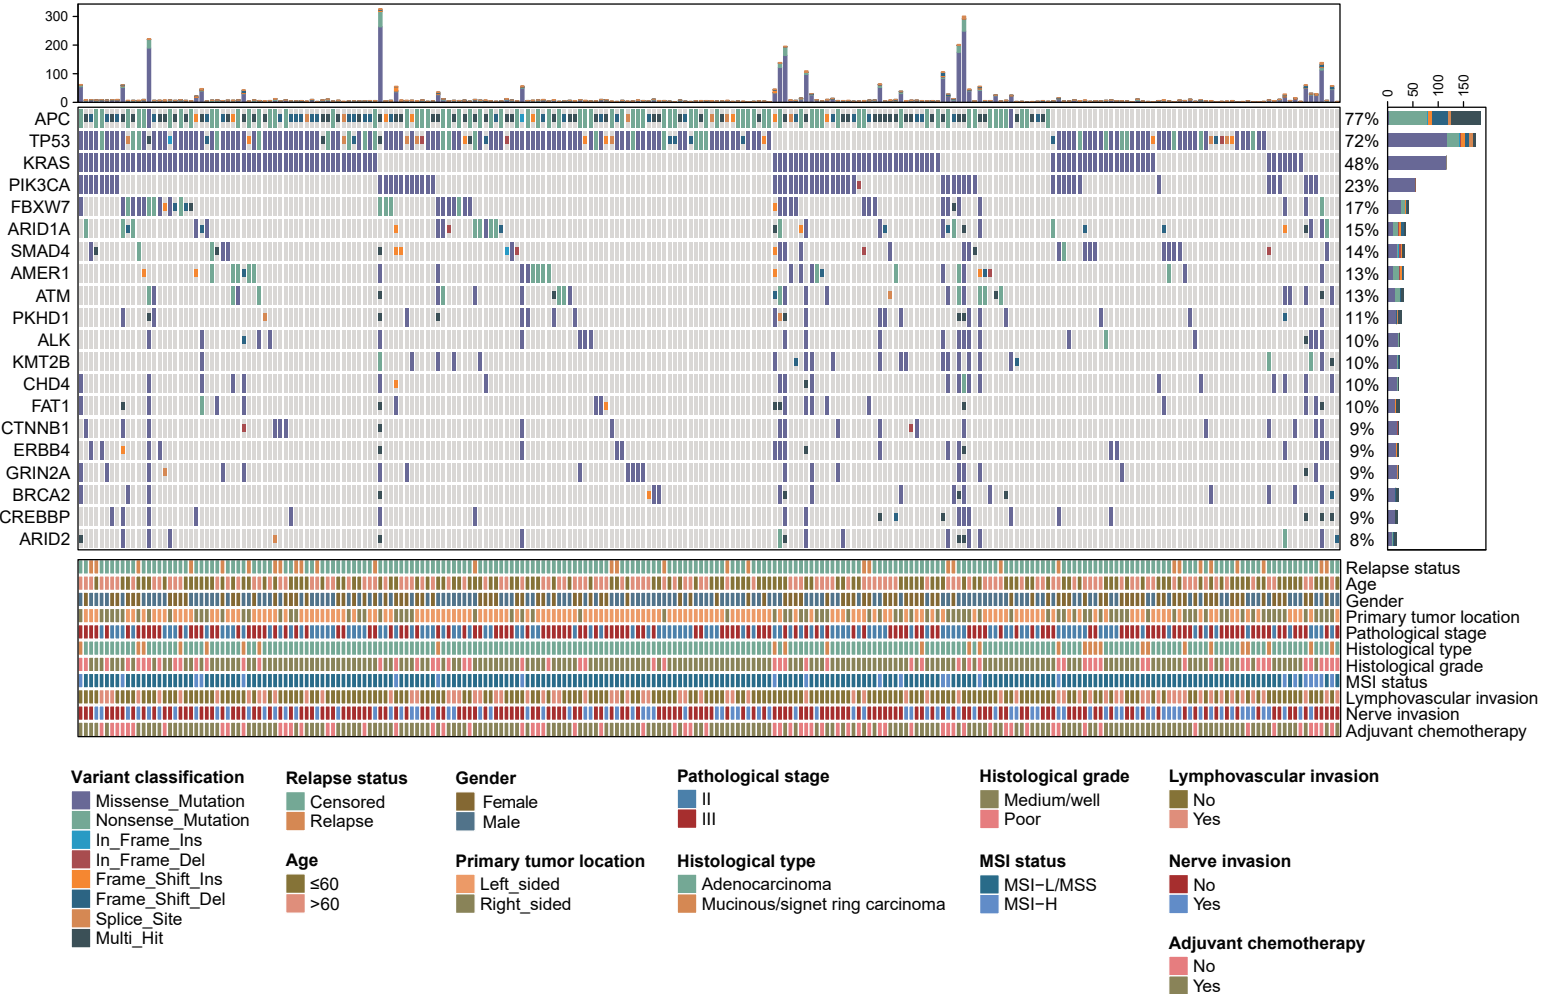

Supplement: 13045_2021_1089_MOESM5_ESM.pdf [file 13045_2021_1089_MOESM5_ESM.pdf]
