# Supplementary material for: Postoperative circulating tumor DNA as markers of recurrence risk in stages II to III colorectal cancer
Source: PubMed Central journal article supplement (PMC8130394; doi:10.1186/s13045-021-01089-z), 2021-05-17
Supplement: 13045_2021_1089_MOESM10_ESM.pdf [file 13045_2021_1089_MOESM10_ESM.pdf]

Figure S3. Kaplan-Meier estimates of recurrence-free survival (RFS) according to preoperative CEA and ctDNA status.

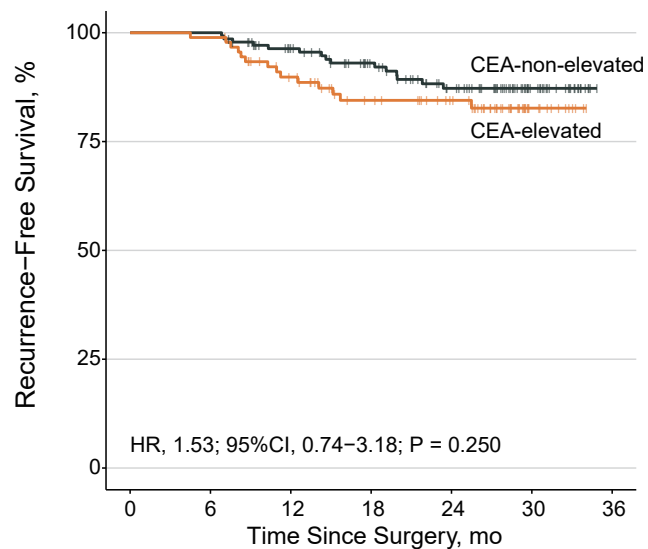

| No.at risk       |     | 0   | 6   | 12  | 18 | 24 | 30 | 36 |
|------------------|-----|-----|-----|-----|----|----|----|----|
| CEA-non-elevated | 140 | 140 | 121 | 101 | 81 | 30 | 0  |    |
| CEA-elevated     | 91  | 90  | 75  | 58  | 49 | 14 | 0  |    |

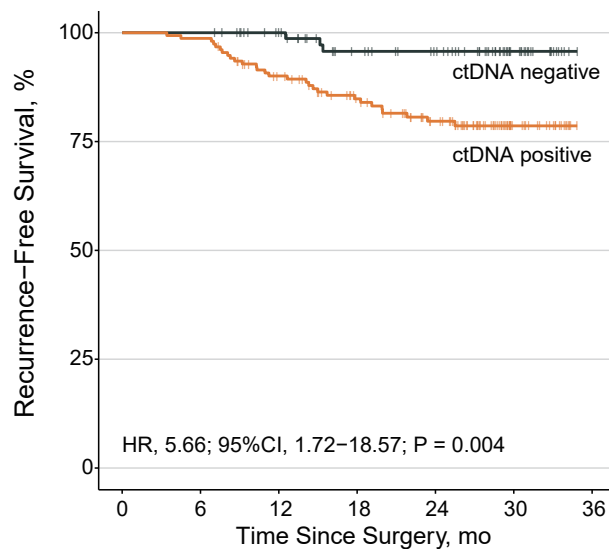

| No.at risk     |     | 0   | 6   | 12  | 18 | 24 | 30 | 36 |
|----------------|-----|-----|-----|-----|----|----|----|----|
| ctDNA negative | 86  | 86  | 76  | 61  | 54 | 24 | 0  |    |
| ctDNA positive | 154 | 152 | 128 | 104 | 82 | 21 | 0  |    |
