# Supplementary material for: Postoperative circulating tumor DNA as markers of recurrence risk in stages II to III colorectal cancer
Source: PubMed Central journal article supplement (PMC8130394; doi:10.1186/s13045-021-01089-z), 2021-05-17

Figure S4. The clinical courses together with ctDNA statuses of 8 out of 20 ctDNA-positive (at day 3-7 post-operation) patients without documented recurrence.

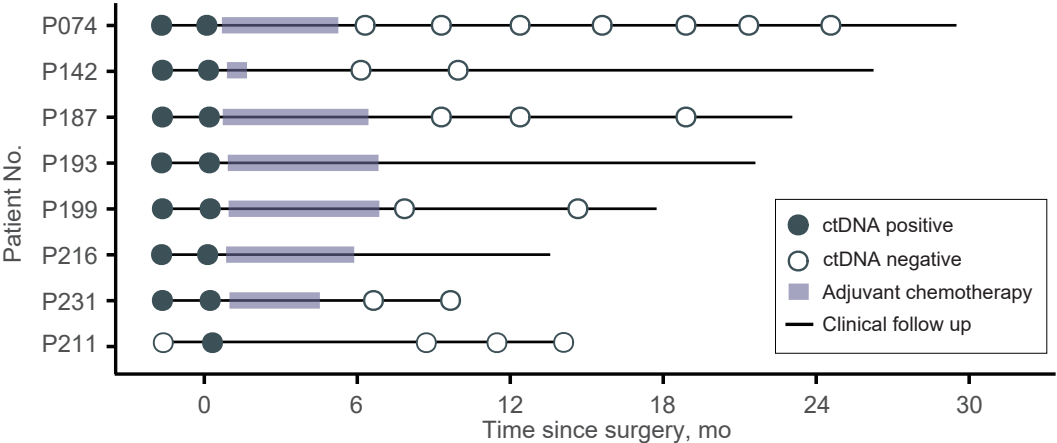

Supplement: 13045_2021_1089_MOESM12_ESM.pdf [file 13045_2021_1089_MOESM12_ESM.pdf]
