# Supplementary material for: Postoperative circulating tumor DNA as markers of recurrence risk in stages II to III colorectal cancer
Source: PubMed Central journal article supplement (PMC8130394; doi:10.1186/s13045-021-01089-z), 2021-05-17

Figure S5. Subgroup analysis of the association between ctDNA status and recurrence-free survival in patients receiving adjuvant chemotherapy or not.

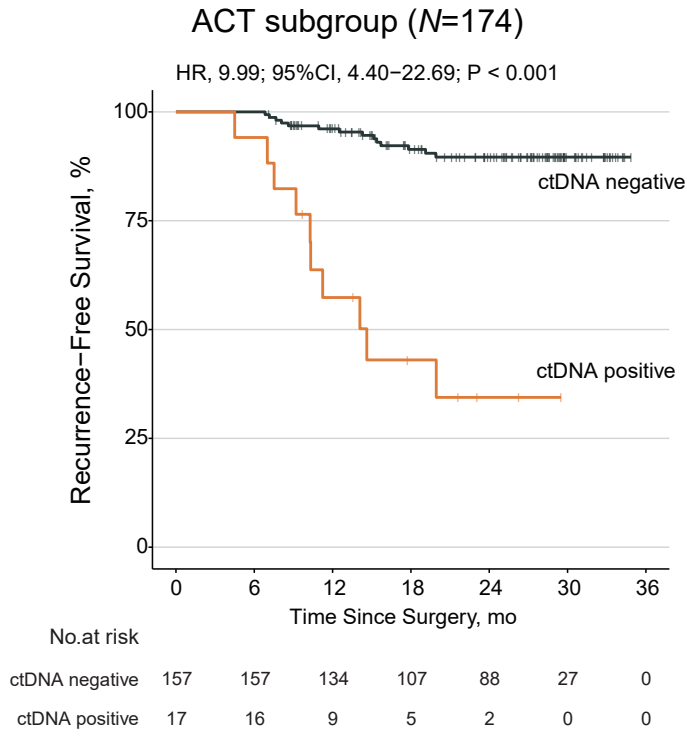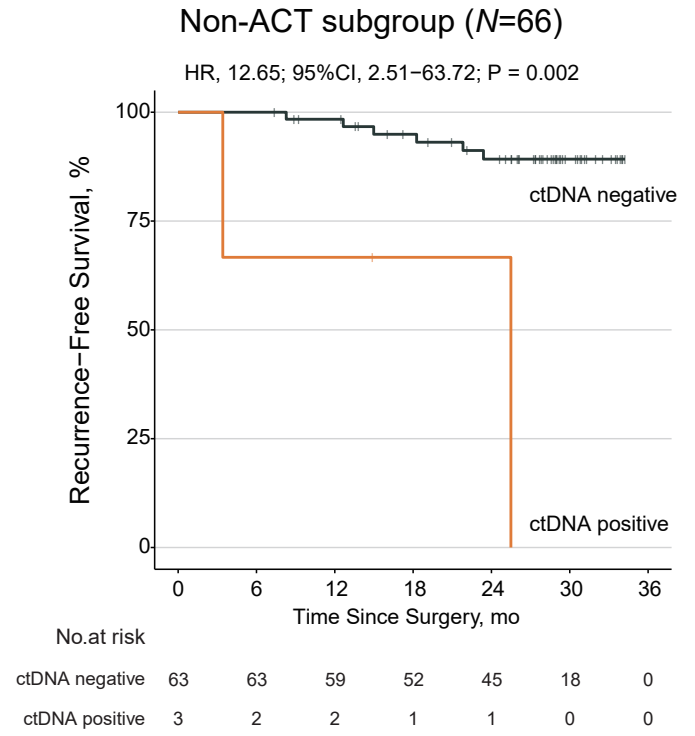

Supplement: 13045_2021_1089_MOESM13_ESM.pdf [file 13045_2021_1089_MOESM13_ESM.pdf]
